# Supplementary material for: Gender-and lesion number-dependent difference in “atherogenic index of plasma” in Chinese people with coronary heart disease
Source: PubMed Central journal article supplement (PMC5643382; doi:10.1038/s41598-017-13267-6), 2017-10-16
Supplement: 41598_2017_13267_MOESM1_ESM.pdf [file 41598_2017_13267_MOESM1_ESM.pdf]

**Gender-and lesion number-dependent difference in “atherogenic index of plasma” in Chinese people with coronary heart disease( supplementary tables and figures)**

Wei Ni<sup>1</sup>, Zhenyu Zhou<sup>1,2</sup>, Tao Liu<sup>1\*</sup>, Haoyu Wang<sup>1</sup>, Jianping Deng<sup>1</sup>, Xiaoyan Liu<sup>3</sup>, Guoqiang Xing<sup>4</sup>

<sup>1</sup>Department of Cardiology, Central Hospital of Nanchong, The Second Clinical School of North Sichuan Medical College, Nanchong, China

<sup>2</sup>Department of Cardiology, The first affiliated hospital of chongqing medical university, Chongqing, China

<sup>3</sup>Department of Geriatrics, Central Hospital of Nanchong, The Second Clinical School of North Sichuan Medical College, Nanchong, China

<sup>4</sup>Department of Imaging & Imaging Institute of Rehabilitation and Development of Brain Function, The Second Clinical School of North Sichuan Medical College, Nanchong, China

\*Corresponding author:

Tao Liu, MD

Department of Cardiology

Central Hospital of Nanchong

The Second Clinical School of North Sichuan Medical College

Nanchong, China

Tel: 86-13890856707

Fax: 86-0817-2223247

email [nclt456@sina.com](mailto:nclt456@sina.com).

**Running title:**

Total words: 2,279 words (excluding references, tables, figures)

References: 26

Tables:3

Figures: 1

**Table1. Demographic and clinical characteristics of study subjects**

|                               | Control(N=234)  | CHD group(N=229) | P value |
|-------------------------------|-----------------|------------------|---------|
| Male, N(%)                    | 135 (57.7)      | 171 (74.7)       | <0.001  |
| Age(y)                        | 65.7± 9.4       | 64.9 ± 10.0      | 0.365   |
| BMI(kg/m <sup>2</sup> )       | 23.9 ± 3.1      | 23.8 ± 3.1       | 0.856   |
| TG(mmol/L)                    | 1.3 [0.5-9.7]   | 1.6 [0.5-11.2]   | 0.002   |
| TC(mmol/L)                    | 4.8± 1.0        | 4.8 ± 1.2        | 0.960   |
| LDL(mmol/L)                   | 3.0 ± 0.9       | 2.8 ± 1.0        | 0.053   |
| HDL(mmol/L)                   | 1.1± 0.3        | 1.1 ± 0.4        | 0.248   |
| FBG(mmol/L)                   | 6.7 ± 2.3       | 8.2 ± 4.8        | <0.001  |
| CRP(mg/L)                     | 2.3 [0.1-278.3] | 2.8 [0.1-317.2]  | 0.924   |
| Hcy(μmol/L)                   | 13.4 ± 6.4      | 15.0± 7.0        | 0.010   |
| AIP                           | 0.1 [-0.5-1.0]  | 0.2 [-0.6-1.0]   | 0.006   |
| Smoking, N(%)                 | 48 (20.5)       | 91 (40.1)        | <0.001  |
| Hypertension, N(%)            | 110 (47.0)      | 120 (52.9)       | 0.209   |
| Diabetes, N(%)                | 35 (15.0)       | 48 (21.1)        | 0.084   |
| Coronary artery lesions, N(%) |                 |                  | <0.001  |
| Normal                        | 234(100.0)      | 0                |         |
| Single-vessel lesion          | 0               | 98(42.8)         |         |
| Multi-vessel lesions          | 0               | 131(57.2)        |         |

BMI = body mass index, TG = triglyceride, TC = total cholesterol, LDL = low-density lipoprotein, HDL = high-density lipoprotein, FBG = fasting blood glucose, CRP = C-reactive protein, Hcy = homocysteine, AIP = atherogenic index of plasma.

**Table 2 Relationship of AIP with CHD by univariate analysis**

|              | N   | Odd ratio(95% CI) | P value |
|--------------|-----|-------------------|---------|
| Age          | 461 | 0.99 (0.97, 1.01) | 0.365   |
| Gender       | 463 |                   |         |
| Female       |     | Ref               |         |
| Male         |     | 2.16 (1.46, 3.21) | <0.001  |
| BMI          | 420 | 0.99 (0.93, 1.06) | 0.855   |
| TG           | 458 | 1.32 (1.10, 1.58) | 0.003   |
| TC           | 458 | 0.99 (0.84, 1.17) | 0.96    |
| LDL          | 453 | 0.82(0.67, 1.00)  | 0.054   |
| HDL          | 457 | 1.36 (0.80, 2.31) | 0.253   |
| AIP          | 457 | 2.52(1.29, 4.94)  | 0.007   |
| FBG          | 461 | 1.15 (1.07, 1.23) | <0.001  |
| CRP          | 350 | 1.00 (0.99, 1.01) | 0.924   |
| Hcy          | 460 | 1.04 (1.01, 1.07) | 0.012   |
| Smoking      | 461 |                   |         |
| No           |     | Ref               |         |
| Yes          |     | 2.59 (1.71, 3.92) | <0.001  |
| Diabetes     | 461 |                   |         |
| No           |     | Ref               |         |
| Yes          |     | 1.52 (0.94, 2.46) | 0.085   |
| Hypertension | 461 |                   |         |
| No           |     | Ref               |         |
| Yes          |     | 1.26 (0.88, 1.82) | 0.209   |

BMI = body mass index, TG = triglyceride, TC = total cholesterol, LDL = low-density lipoprotein, HDL = high-density lipoprotein, AIP = atherogenic index of plasma, FBG = fasting blood glucose, CRP = C-reactive protein, Hcy = homocysteine.

**Table 3 Relationship of AIP with CHD by multivariable logistic-regression model according to gender**

|                         | Model 1 |                    |       | Model 2 |                    |         |
|-------------------------|---------|--------------------|-------|---------|--------------------|---------|
|                         | N       | Odd ratio(95% CI)  | P     | N       | Odd ratio(95% CI)  | P Value |
| <b>Female</b>           | 155     |                    |       | 139     |                    |         |
| <b>AIP</b>              | 155     | 0.75 (0.21, 2.60)  | 0.646 | 139     | 0.47 (0.11, 2.08)  | 0.318   |
| <b>Quartiles of AIP</b> | 155     |                    |       | 139     |                    |         |
| Q1                      |         | Ref                |       |         | Ref                |         |
| Q2                      |         | 1.60 (0.59, 4.29)  | 0.352 |         | 1.16 (0.38, 3.60)  | 0.795   |
| Q3                      |         | 1.92 (0.74, 4.99)  | 0.181 |         | 1.67 (0.55, 5.06)  | 0.366   |
| Q4                      |         | 0.85 (0.28, 2.60)  | 0.776 |         | 0.43 (0.11, 1.75)  | 0.239   |
| <b>P for trend</b>      | 155     | 0.99 (0.72, 1.37)  | 0.966 | 139     | 0.87 (0.59, 1.29)  | 0.494   |
| <b>Male</b>             | 302     |                    |       |         |                    |         |
| <b>AIP</b>              | 302     | 4.90 (2.11, 11.38) | 0.001 | 273     | 4.44 (1.62, 12.21) | 0.004   |
| <b>Quartiles of AIP</b> | 302     |                    |       | 273     |                    |         |
| Q1                      |         | Ref                |       |         | Ref                |         |
| Q2                      |         | 0.88 (0.46, 1.66)  | 0.683 |         | 0.862(0.41, 1.81)  | 0.693   |
| Q3                      |         | 1.74 (0.89, 3.38)  | 0.100 |         | 1.51 (0.694 3.27)  | 0.300   |
| Q4                      |         | 2.18 (1.17, 4.07)  | 0.014 |         | 2.10 (1.00, 4.37)  | 0.049   |
| <b>P for trend</b>      | 302     | 1.34 (1.10, 1.64)  | 0.004 | 273     | 1.32 (1.04, 1.67)  | 0.021   |

Model 1: Crude

Model 2: Adjusted age, BMI, FBG, Hcy and Smoking

AIP = atherogenic index of plasma.

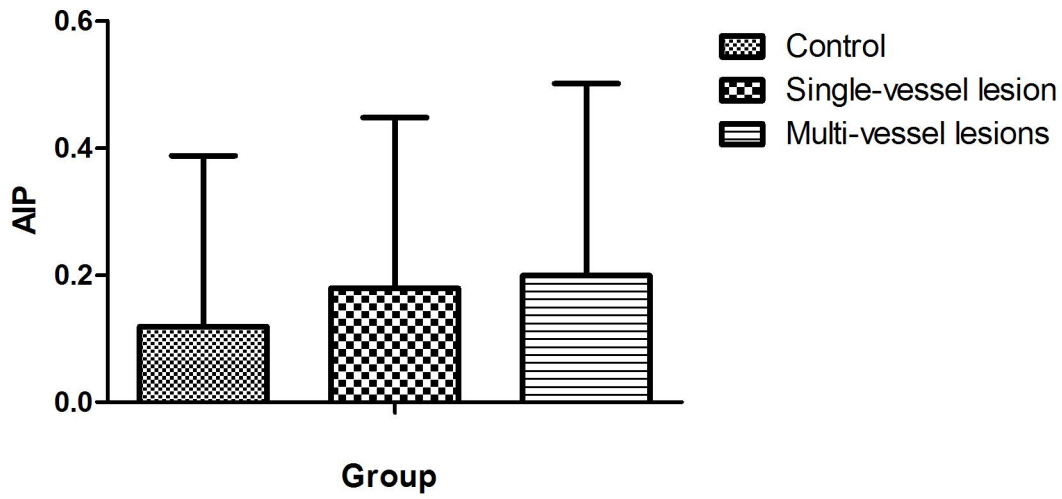

Fig 1. Analysis of variance between control, single-vessel lesion and multi-vessel lesions. The difference between multivessel lesions group and control group was statistically significant ( $P=0.028$ ), and there was no statistical significance between the other groups( $P>0.05$ ).
